# Supplementary figures and images for: Saccharification of thermochemically pretreated cellulosic biomass using native and engineered cellulosomal enzyme systems
Source: Royal Society of Chemistry journal article supplement (doi:10.1039/c6re00172f), 2016-01-01

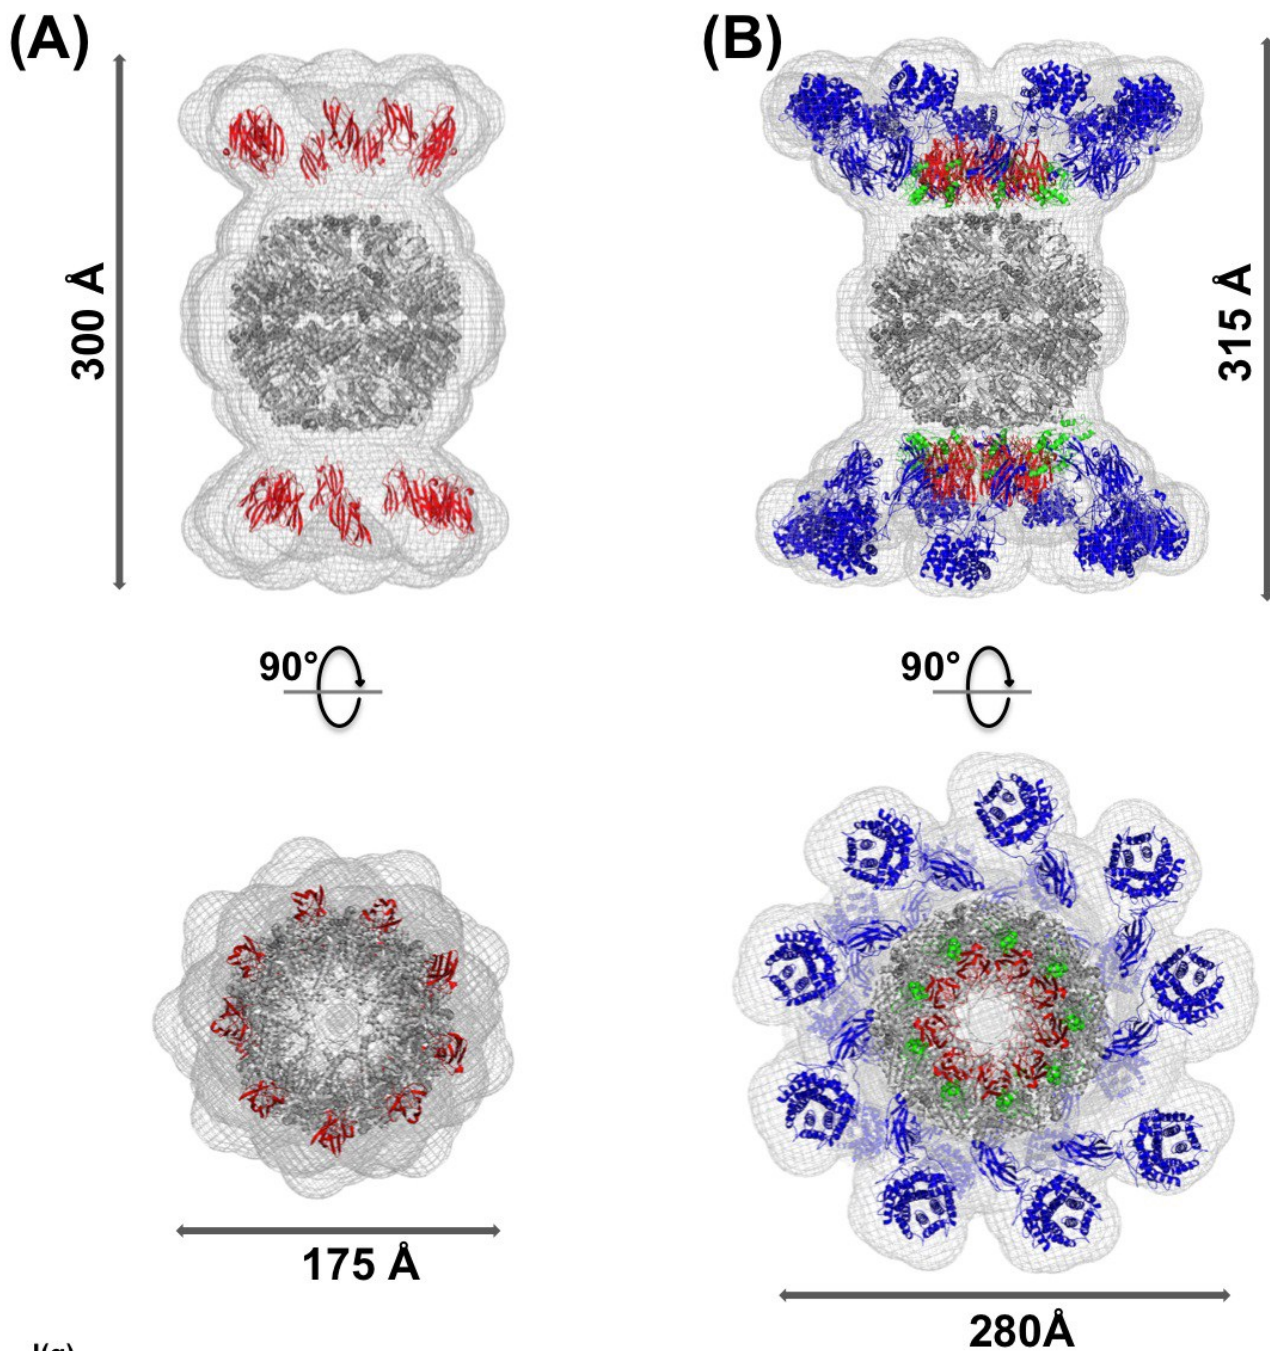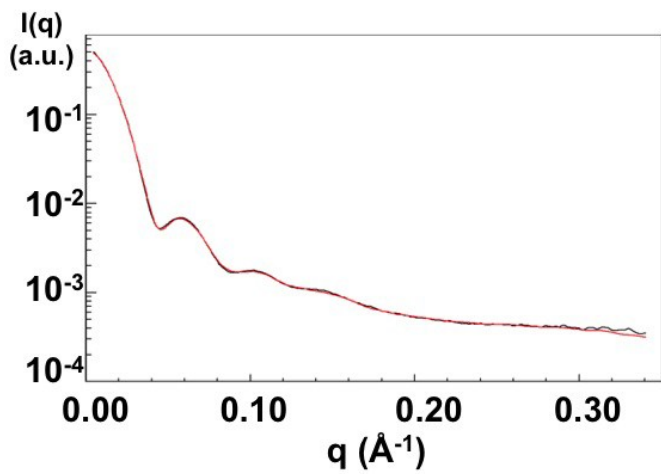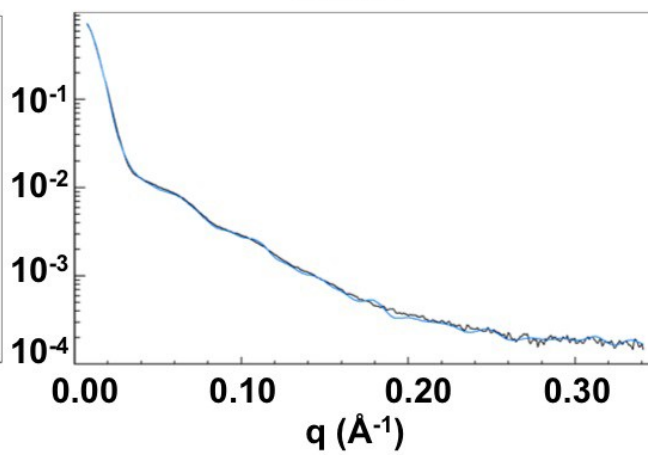

Supplement: c6re00172f2.pdf [file c6re00172f2.pdf]
